# Supplementary material
Source: Springer Nature journal article supplement (https://www.springermedizin.de/resource/supplementary/12889_2010_2900_MOESM1_ESM.pdf/9487612)

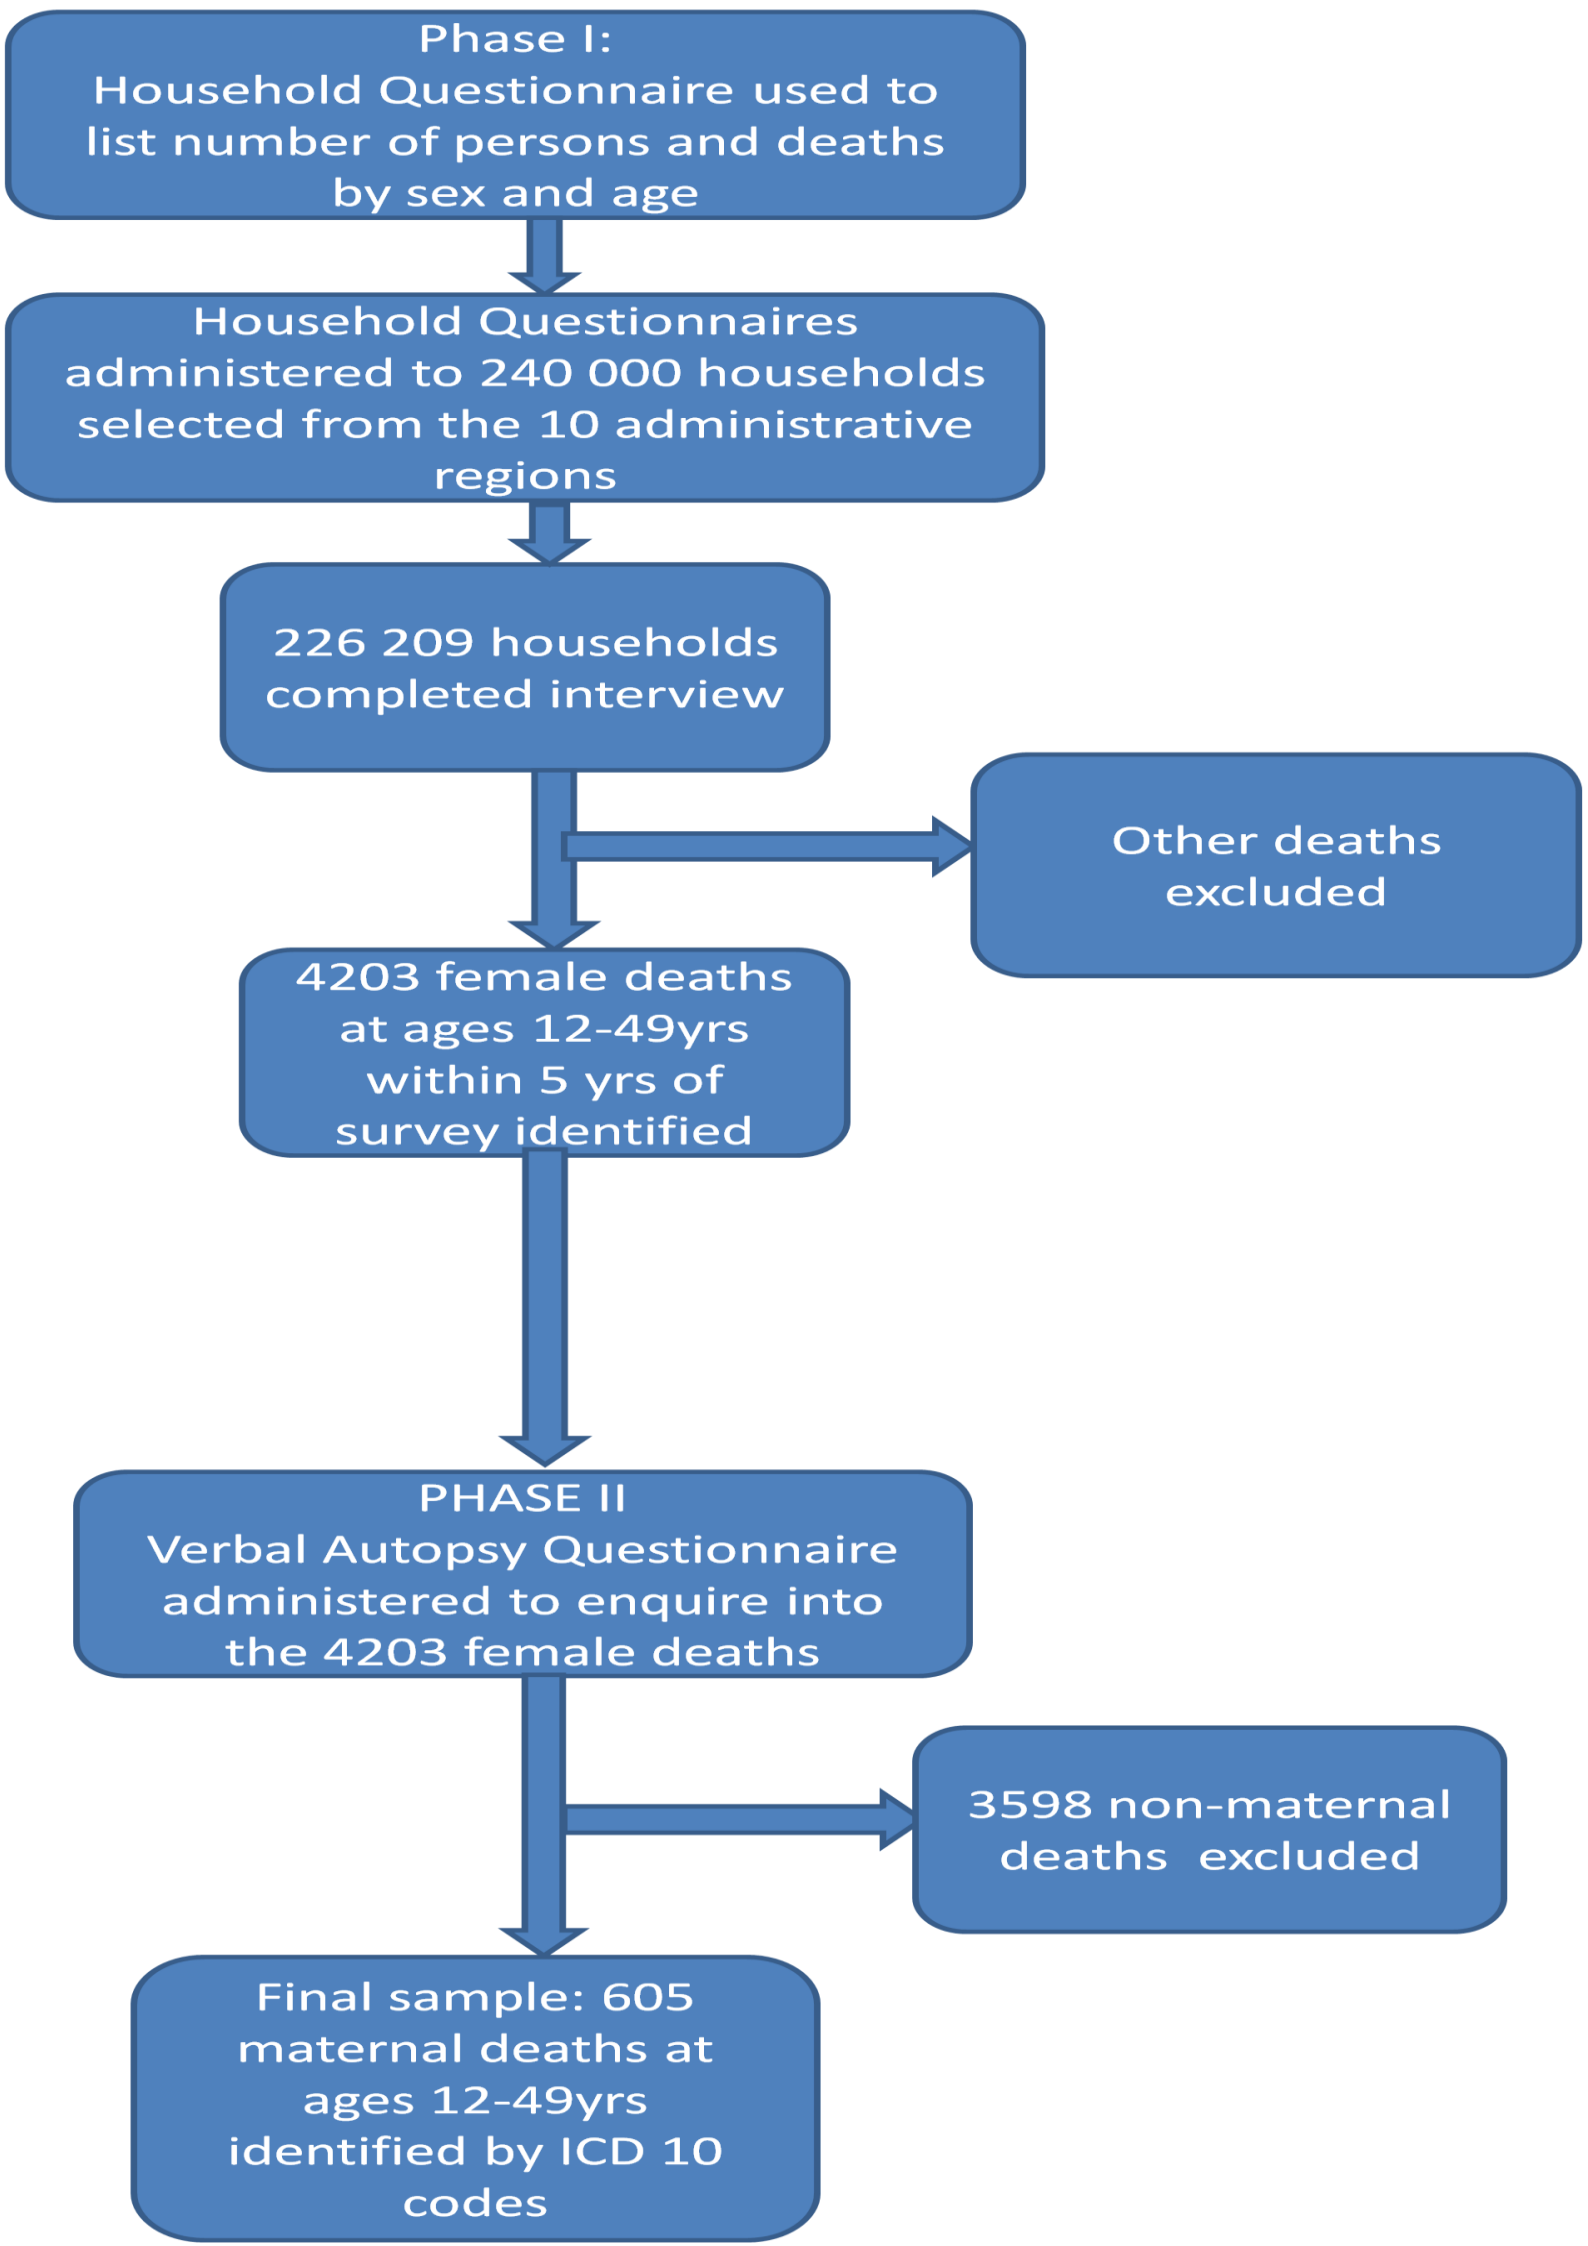

Supplement: MOESM1 [file 9487612]
